# Supplementary material for: Multiyear chemical composition of the fine aerosol fraction inAthens, Greece, with emphasis on winter-time residential heating
Source: Copernicus journal article supplement (doi:10.5194/acp-2018-163), 2018-03-27
Supplement: Supplementary file 1 [file acp-2018-163-supplement.pdf]

*Supplement of*

**Multiyear chemical composition of the fine aerosol fraction in Athens, Greece, with emphasis on winter-time residential heating**

C. Theodosi et al.

5 Correspondence to: N. Mihalopoulos ([mihalo@uoc.gr](mailto:mihalo@uoc.gr)) and C. Theodosi ([c\\_theodosi@chemistry.uoc.gr](mailto:c_theodosi@chemistry.uoc.gr))

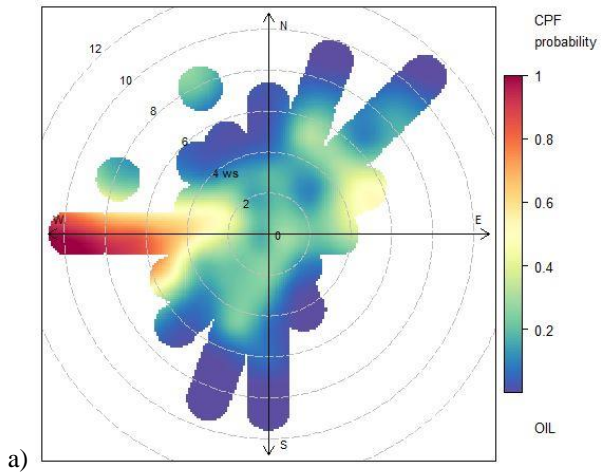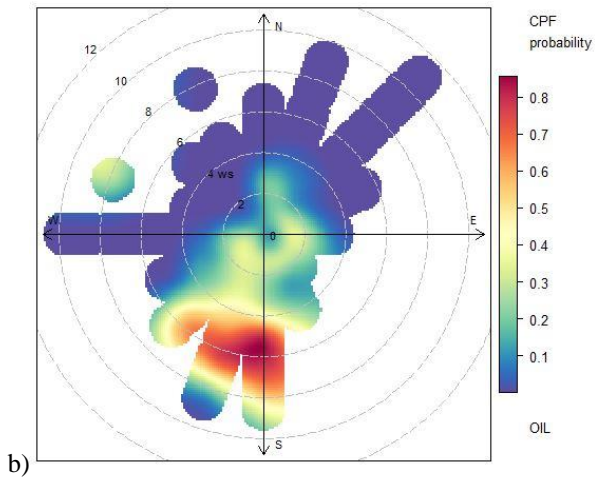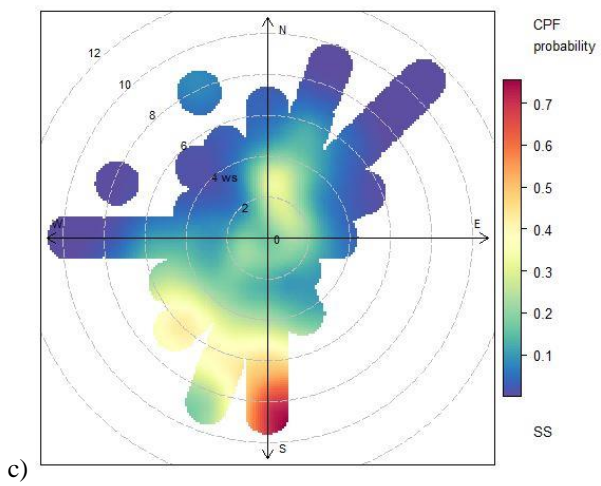

**Figure S1: Bivariate (wind speed and speed) polar plots that PMF-estimated contributions will: a) be in the 50<sup>th</sup> -75<sup>th</sup> percentile range for the oil combustion factor b) exceed the 75<sup>th</sup> percentile for the oil combustion factor c) be in the 50-90<sup>th</sup> percentile for the sea salt factor. Calm winds (wind speed < 0.5 m s<sup>-1</sup>) were excluded.**

5

| PMF parameter                                                |                                                                                                                 |    |
|--------------------------------------------------------------|-----------------------------------------------------------------------------------------------------------------|----|
| N species                                                    | 19                                                                                                              |    |
| N samples                                                    | 146                                                                                                             | 5  |
| Down-weighted species                                        | Cd, Ca <sup>2+</sup>                                                                                            |    |
| Excluded species                                             | Mg <sup>2+</sup> , As                                                                                           |    |
| Added uncertainty                                            | 5%                                                                                                              |    |
| Base Solution                                                |                                                                                                                 |    |
| N factors                                                    | 6                                                                                                               |    |
| Q <sub>ROBUST</sub> / Q <sub>EXP</sub>                       | 3.47                                                                                                            |    |
| Q <sub>ROBUST</sub> / Q <sub>EXP</sub> (-1 factor)           | 3.06                                                                                                            | 10 |
| Q <sub>ROBUST</sub> / Q <sub>EXP</sub> (+1 factor)           | 3.02                                                                                                            |    |
| r <sup>2</sup> , Slope                                       | 0.85, 0.94                                                                                                      |    |
| BS-DISP results                                              |                                                                                                                 |    |
| Number of resamples                                          | 100                                                                                                             |    |
| % of BS factors assigned                                     | 99% (OIL,BB), 100%(remaining 4)                                                                                 |    |
| DISP %dQ                                                     | -0.50                                                                                                           |    |
| DISP % of factor swaps                                       | 0                                                                                                               | 15 |
| BS-DISP Displaced species                                    | K, Cu, SO <sub>4</sub> <sup>2-</sup> , Ni, Fe, Cl <sup>-</sup>                                                  |    |
| BS-DISP %dQ                                                  | -0.84                                                                                                           |    |
| BS-DISP % of factor swaps                                    | 2                                                                                                               |    |
| BS-DISP error interval ratios for factor identifying species | K : 0.81<br>Cu : 1.07<br>SO <sub>4</sub> <sup>2-</sup> : 0.40<br>Ni: 0.71<br>Fe: 0.61<br>Cl <sup>-</sup> : 0.20 | 20 |

**Table S1: Summary of PMF settings and error estimation (EE) diagnostics**
