# Supplementary material for: Multiyear chemical composition of the fine aerosol fraction inAthens, Greece, with emphasis on winter-time residential heating
Source: Copernicus journal article supplement (doi:10.5194/acp-2018-163), 2018-03-27
Supplement: Supplementary file [file acp-2018-163-AC4-supplement.pdf]

We would like to thank the editor for his comment which will be taken into consideration in the revised version and will be adequately referenced. Note however that the work on ACSM addresses the sources and origin of organic submicron particulate matter in Athens during summer and winter. Thus there is no overlap in the objectives and methodology and partly address the issue of wood burning by using another approach.
